# Supplementary material
Source: publisher figshare collection journal article supplement (https://diabetesjournals.figshare.com/ndownloader/files/39390329)
Supplement: Supplementary file 1 [file 39390329]

**Supplemental Table S3 –** Risk of psychiatric morbidity according to previous GDM in women delivering in Denmark in 1997–2018 (*n*=342,572)

|  |  | GDM |  |  | No GDM |  |  | Hazard ratio (95% CI) |  |
| --- | --- | --- | --- | --- | --- | --- | --- | --- | --- |
|  | *n* events | Risk time | IR (95% CI)* | *n* events | Risk time | IR (95% CI)* | Crude | Model 1† | Model 2‡ |
| *Primary outcome* |  |  |  |  |  |  |  |  |  |
| Depression§ | 1,271 | 67,207 | 18.9 (17.9–20.0) | 32,917 | 2,038,902 | 16.1 (16.0–16.3) | 1.19 (1.13–1.26) | 1.21 (1.14–1.28) | 1.12 (1.06–1.19) |
| *Secondary outcomes* |  |  |  |  |  |  |  |  |  |
| Any psychiatric diagnosis|| | 535 | 72,976 | 7.3 (6.7–8.0) | 13,322 | 2,166,687 | 6.2 (6.1–6.3) | 1.19 (1.10–1.30) | 1.21 (1.11–1.32) | 1.17 (1.08–1.28) |
| Depressive disorders | 311 | 74,459 | 4.2 (3.7–4.7) | 6,685 | 2,206,872 | 3.0 (3.0–3.1) | 1.38 (1.24–1.55) | 1.39 (1.24–1.56) | 1.29 (1.15–1.45) |
| Anxiety disorders | 167 | 75,523 | 2.2 (1.9–2.6) | 3,952 | 2,225,560 | 1.8 (1.7–1.8) | 1.22 (1.04–1.42) | 1.23 (1.06–1.44) | 1.28 (1.10–1.50) |
| Bipolar disorders | 30 | 76,420 | 0.4 (0.3–0.6) | 803 | 2,244,278 | 0.4 (0.3–0.4) | 1.05 (0.73–1.51) | 1.13 (0.79–1.63) | 1.11 (0.77–1.61) |
| Psychotic disorders | 34 | 76,349 | 0.5 (0.3–0.6) | 780 | 2,243,654 | 0.4 (0.3–0.4) | 1.28 (0.91–1.81) | 1.24 (0.88–1.75) | 1.26 (0.89–1.79) |
| Substance use disorders | 117 | 75,784 | 1.5 (1.3–1.9) | 3,840 | 2,224,293 | 1.7 (1.7–1.8) | 0.89 (0.74–1.07) | 0.92 (0.77–1.11) | 0.91 (0.75–1.10) |
| Postpartum psychiatric disease | 5 | 76,481 | 0.1 (0.0–0.2) | 183 | 2,245,862 | 0.1 (0.1–0.1) | 0.93 (0.38–2.25) | 0.93 (0.38–2.26) | 0.95 (0.38–2.34) |
| Any psychopharmacological medication¶ | 1,300 | 66,908 | 19.4 (18.4–20.5) | 34,277 | 2,030,593 | 16.9 (16.7–17.1) | 1.17 (1.11–1.24) | 1.19 (1.12–1.25) | 1.11 (1.05–1.17) |
| Antidepressants# | 1,219 | 67,590 | 18.0 (17.1–19.1) | 31,696 | 2,047,326 | 15.5 (15.3–15.7) | 1.19 (1.12–1.26) | 1.21 (1.14–1.28) | 1.11 (1.05–1.18) |
| Antipsychotics# | 197 | 75,352 | 2.6 (2.3–3.0) | 4,535 | 2,224,222 | 2.0 (2.0–2.1) | 1.25 (1.08–1.44) | 1.25 (1.08–1.44) | 1.17 (1.01–1.35) |
| Anxiolytics# | 178 | 75,181 | 2.4 (2.0–2.8) | 4,977 | 2,215,837 | 2.3 (2.2–2.3) | 1.06 (0.91–1.23) | 1.02 (0.88–1.19) | 1.07 (0.92–1.25) |

* IR, incidence rate presented as number of events per 1000 person-years

† Model 1: Adjusted for age, parity, Charlson Comorbidity Index score, ethnicity, marital status, income, education, occupation, and calendar year of delivery

‡ Model 2: Adjusted for age, parity, Charlson Comorbidity Index score, ethnicity, marital status, income, education, occupation, calendar year of delivery, and pregestational BMI

§ Diagnoses of depressive disorder and/or ≥2 redeemed prescriptions of antidepressant medication

|| Diagnosis of depressive disorders, anxiety disorders, bipolar disorders, psychotic disorders, substance use disorders, or postpartum psychiatric disease

¶ ≥2 redeemed prescriptions within each of the groups: antidepressants, antipsychotics, or anxiolytics

# ≥2 redeemed prescriptions
